# Supplementary material for: Bearing Aluminum-Based Alloys: Microstructure, Mechanical Characterizations, and Experiment-Based Modeling Approach
Source: MDPI journal article supplement (doi:10.3390/ma15238394), 2022-11-25
Supplement: s1 [file s1]

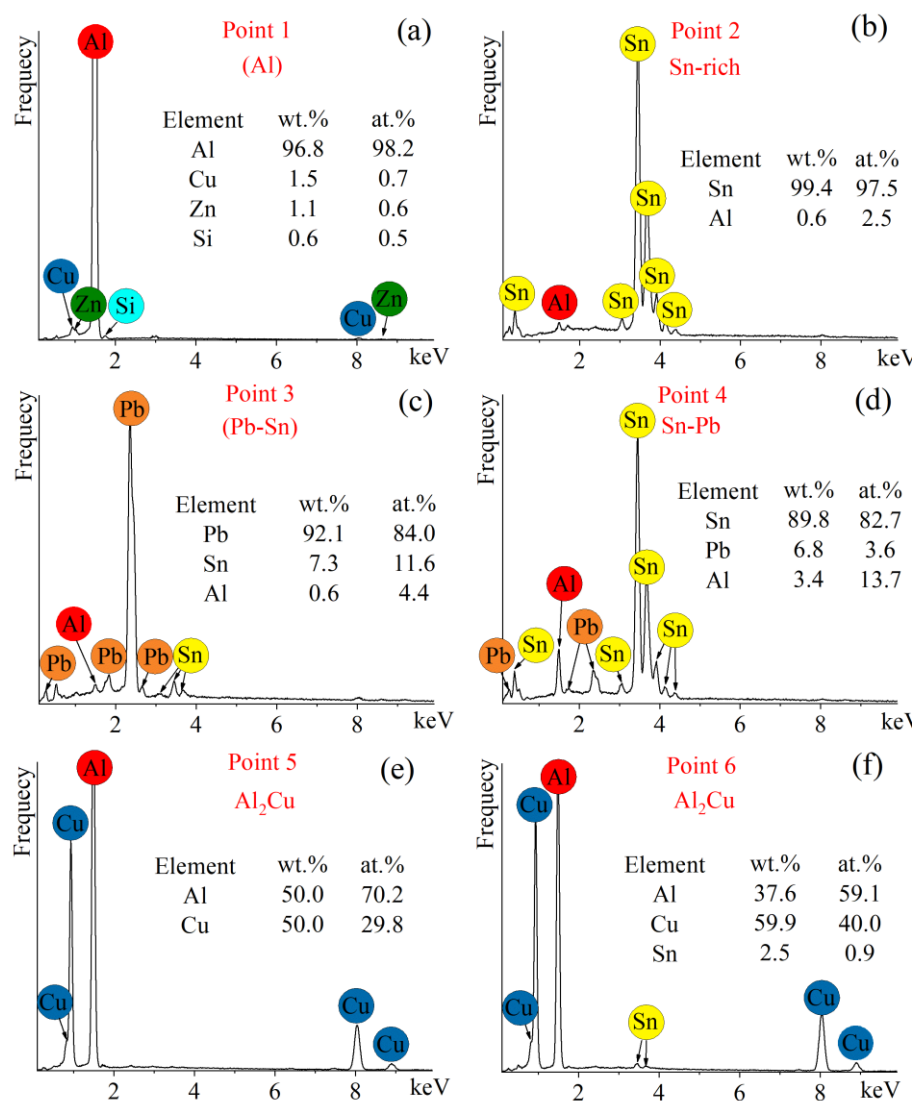

**Figure S1.** SEM-EDS spectrums taken from (a) the aluminium-based solid solution (point 1), the Sn-rich phase (point 2), the Pb-Sn phase (point 3), the Sn-Pb phase (point 4) and the  $\text{Al}_2\text{Cu}$  phases (points 5 and 6) in the Al-7.6Sn alloy.

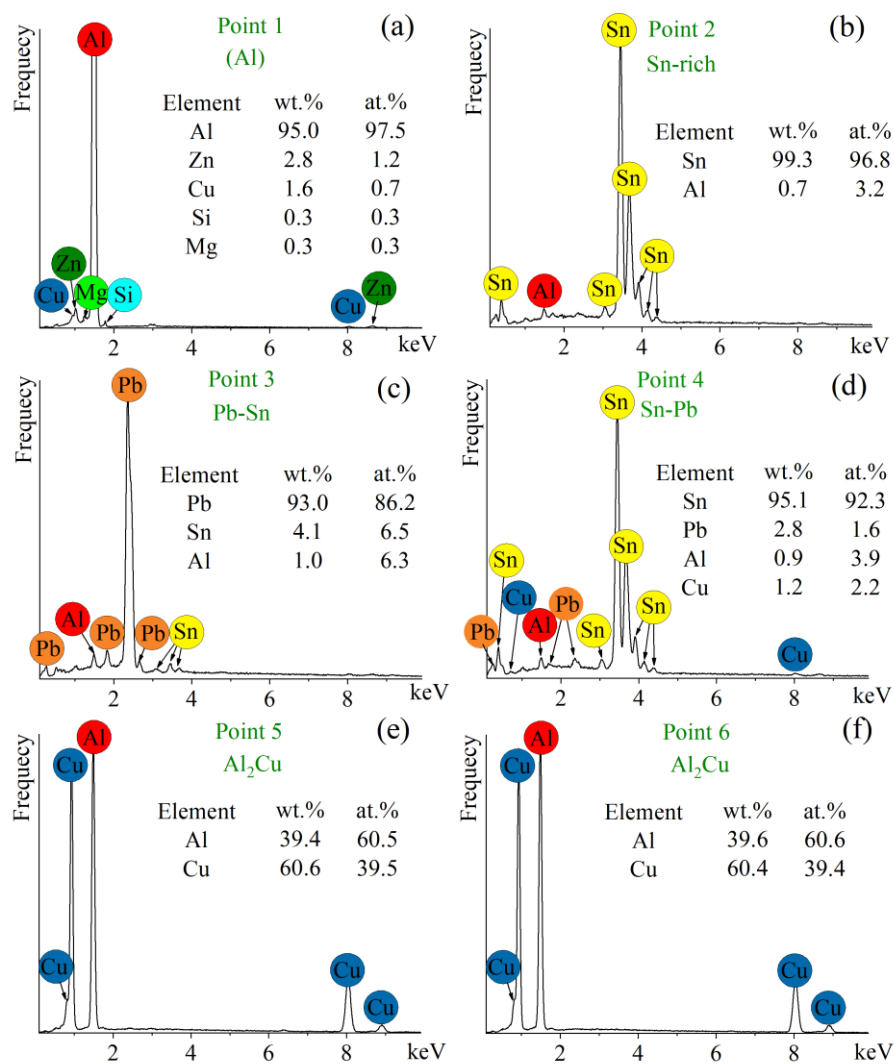

**Figure S2.** SEM-EDS spectra taken from (a) the aluminium-based solid solution (point 1), the Sn-rich phase (point 2), the Pb-Sn phase (point 3), the Sn-Pb phase (point 4) and the Al<sub>2</sub>Cu phases (points 5 and 6) in the Al-6.4Sn alloy.

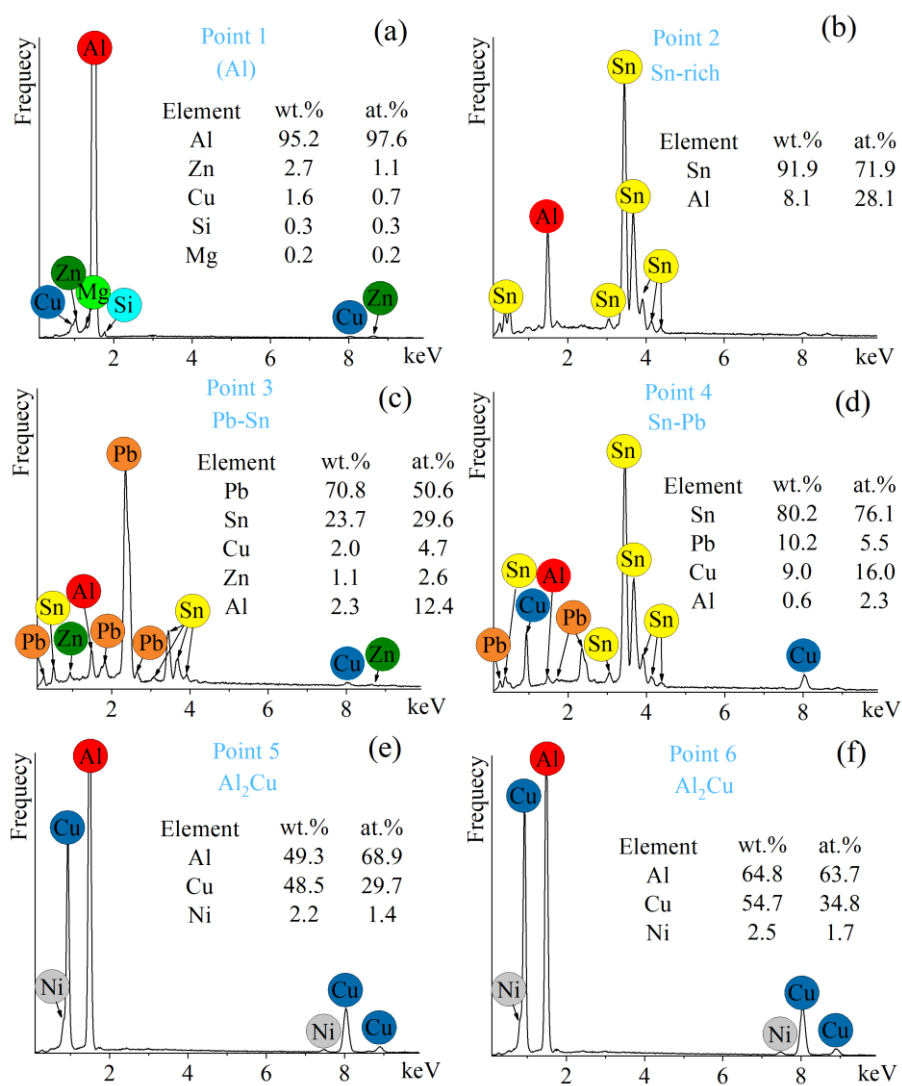

**Figure S3.** SEM-EDS spectra taken from (a) the aluminium-based solid solution (point 1), the Sn-rich phase (point 2), the Pb-Sn phase (point 3), the Sn-Pb phase (point 4) and the Al<sub>2</sub>Cu phases (points 5 and 6) in the Al-5.7Sn alloy.
